# Supplementary material for: Niobium and vanadium iminophosphinimide complexes
Source: Royal Society of Chemistry journal article supplement (doi:10.1039/b105584b), 2001-01-01
Supplement: b105584b.doc [file b105584b.doc]

**Supporting Information for the paper entitled,**

**“Niobium and vanadium iminophosphinimide complexes”**

**Justin K. Brask, Michael G. Fickes, Preeyanuch Sangtrirutnugul, Víctor Durà-Vilà, Aaron L. Odom and Christopher C. Cummins***

Department of Chemistry, Room 2-227, Massachusetts Institute of Technology, Cambridge, MA 02139-4307, USA.

# **Contents**

# **1. Experimental Procedure** 3

1.1. General Considerations 3

- 1. Synthesis of {[Ar(But)N]3VNNa}2 (**1b**) 3

1.3. Synthesis of [Ar(R)N]3Nb(NPCl2) (**2a**) 4

1.4. Synthesis of [Ar(But)N]3V(NPCl2) (**2b**) 4

- 1. Synthesis of [Ar(R)N]3Nb[NP(NHBut)2] (**3a**) 5

1.6. Synthesis of [Ar(But)N]3V[NP(NHBut)2] (**3b**) 5

1.7. Synthesis of [Ar(R)N]3Nb[NP(Cl)(NHBut)] (**4a**) 6

- 1. Synthesis of [Ar(But)N]3V[NP(Cl)(NHBut)] (**4b**) 7

1.9. Synthesis of [Ar(R)N]3Nb(NPNBut) (**5a**) 7

1.10. Synthesis of [Ar(R)N]3V(NPNBut) (**5b**) 8

1.11. Synthesis of [Ar(R)N]3NbNP(-NBut)2PNNb[N(R)Ar]3 (**6**) 8

**2. Density Functional Theory Calculations** 9

**3. References** 14

### 1. Experimental Procedure

**1.1. General Considerations**

All manipulations were carried out in a nitrogen-filled drybox or under an argon stream by way of standard Schlenk techniques. Solvents, including deuterated solvents, were freed of impurities using standard procedures and stored over 4 Å molecular sieves under nitrogen. The complexes {[Ar(R)N]3NbNNa}2 1 [Ar = 3,5-Me2C6H3; R = C(CD3)2CH3] (**1a**) and [Ar(But)N]3V 2 (Ar = 3,5-Me2C6H3) were prepared as reported previously. The reagents PCl3 and ButNH2 were freshly distilled prior to use. NaN3 was prepared anhydrous via multiple washings with THF and subsequent drying *in vacuo*. Me3SiCl and LiN(SiMe3)2 (Aldrich) were employed as received. All samples for NMR spectroscopy were prepared as solutions in C6D6 at 23 C. 31P{1H} and 51V NMR chemical shifts are reported relative to 85% H3PO4 in D2O (0.0 ppm) and *neat* OVCl3 (0.0 ppm), respectively. Elemental analyses (C, H, N) were carried out by H. Kolbe Mikroanalytisches Laboratorium (Mülheim an der Ruhr, Germany).

**1.2. Synthesis of {[Ar(But)N]3VNNa}2 (1b)**

NaN3 (1.00 g, 15.4 mmol) was added to a dark green solution of [Ar(But)N]3V (3.00 g, 5.17 mmol) in THF (100 mL) cooled to –35 C. The mixture was stirred for 3.5 h at 23 C and subsequently filtered through Celite to remove excess NaN3. All volatiles were removed *in vacuo* and the residue was triturated with pentane (3 x 25 mL) to yield **1b** (2.81 g, 4.56 mmol, 88%) as a yellow powder. Anal. Calc. for C72H108N8Na2V2: C, 70.11; H, 8.82; N, 9.08. Found: C, 69.98; H, 8.76; N, 8.97%. 1H NMR: ** 6.73 (s, 6 H, *para*), 6.69 (s, 12 H, *ortho*), 2.27 (s, 36 H, Me), 1.40 (br, 54 H, But). 13C{1H} NMR: ** 146.2 (s), 136.9 (s), 130.4 (s), 125.3 (s), 56.1 (s), 32.5 (s), 21.5 (s). 51V NMR: ** -173.5 (s, 1/2 = 134 Hz).

**1.3. Synthesis of [Ar(R)N]3Nb(NPCl2) (2a)**

A solution of **1a** (0.993 g, 0.734 mmol) in THF (21 mL) cooled to –35 C was added dropwise to a solution of PCl3 (0.211 g, 1.54 mmol) in THF (2 mL) and the mixture was stirred for 0.5 h. All volatiles were removed *in vacuo* and the residue was extracted with pentane (12 x 20 mL), filtered through Celite, and subsequently pumped to dryness to yield **2a** (0.950 g, 1.26 mmol, 86%) as a pale yellow powder. Crystalline **2a** was obtained in 66% yield from pentane at –35 C. Anal. Calc. for C36Cl2D18H36N4NbP: C, 57.21; H, 7.20; N, 7.41. Found: C, 57.79; H, 7.51; N, 7.30%. 1H NMR: ** 6.67 (s, 3 H, *para*), 5.84 (s, 6 H, *ortho*), 2.06 (s, 18 H, Me), 1.36 (s, 9 H, But).  13C{1H} NMR: ** 148.4 (s), 137.3 (s), 129.5 (s), 61.7 (s), 31.8 (s), 31.1 (hept, 1*J*D-C = 19 Hz), 21.4 (s). 31P{1H} NMR: ** 158.0 (br, 1/2 = 160 Hz).

**1.4. Synthesis of [Ar(But)N]3V(NPCl2) (2b)**

A pale green solution of the dimer **1b** (1.00 g, 0.811 mmol) in THF (40 mL) was added dropwise to a solution of PCl3 (0.500 g, 3.64 mmol) in THF (10 mL) at –35 C and the resulting red mixture was stirred for 2 h at 23 C. All volatiles were removed *in vacuo* and the residue was extracted with diethyl ether (100 mL), filtered through Celite, and subsequently pumped to dryness to yield **2b** (1.00 g, 1.44 mmol, 89%) as a dark red powder. Anal. Calc. for C36Cl2H54N4PV: C, 62.16; H, 7.82; N, 8.05. Found: C, 62.22; H, 8.27; N, 7.72%. 1H NMR: ** 6.66 (s, 3 H, *para*), 4.80 (br, 6 H, *ortho*), 2.08 (s, 18 H, Me), 1.43 (s, 27 H, But).  13C{1H} NMR: ** 149.2 (s), 138.6 (s), 134.2 (s), 129.1 (s), 61.4 (s), 32.3 (s), 21.0 (s). 31P{1H} NMR: ** 155.0 (br, 1/2 = 364 Hz).  51V NMR: ** 91.0 (s, 1/2 = 275 Hz).

**1.5. Synthesis of [Ar(R)N]3Nb[NP(NHBut)2] (3a)**

A solution of ButNH2 (0.130 g, 1.78 mmol) in NEt3 (4.5 mL) cooled to –35 C was added dropwise to a solution of **2a** (0.306 g, 0.405 mmol) in benzene (8 mL) and the mixture was stirred for 1.5 h. All volatiles were removed *in vacuo* and the residue was extracted with pentane (5 x 4 mL), filtered through Celite, and subsequently pumped to dryness to yield **3a** (0.311 g, 0.375 mmol, 92%) as a yellow powder. 1H NMR: ** 6.71 (s, 3 H, *para*), 6.15 (br, 6 H, *ortho*), 2.31 (d, 2 H, N-H), 2.16 (s, 18 H, Me), 1.46 (overlap, 27 H, But). 31P{1H} NMR: ** 100.5 (s, 1/2 = 85 Hz). Repeated attempts to obtain decent elemental analysis data were unsuccessful.

**1.6. Synthesis of [Ar(But)N]3V[NP(NHBut)2] (3b)**

*Neat* ButNH2 (2.00 g, 27.3 mmol) was added dropwise to a stirred, dark red solution of **2b** (0.800 g, 1.15 mmol) in toluene (40 mL) at 23 C. After 6 h, the resulting orange mixture was filtered through Celite (to remove ButNH3Cl) and an additional 2.00 g of *neat* ButNH2 were added. Upon further stirring for 12 h, the mixture was again filtered through Celite and subsequently pumped to dryness *in vacuo*. Recrystallization of the residue from pentane (4 mL) yielded orange microcrystalline **3b** (0.478 g, 0.622 mmol, 54%). Anal. Calc. for C44H74N6PV: C, 68.72; H, 9.70; N, 10.93. Found: C, 67.85; H, 9.78; N, 10.46%. 1H NMR: ** 6.70 (s, 3 H, *para*), 4.5-5 (br, 6 H, *ortho*), 2.61 (br, 2 H, N-H), 2.18 (s, 18 H, Me), 1.52 (s, 27 H, anilide But), 1.43 (d, 18 H, But, 4*J*P-H = 1.2 Hz).  13C{1H} NMR: ** 151.4 (s), 137.7 (s), 135.6 (s), 130.6 (s), 61.2 (s), 59.8 (br), 33.2 (s), 22.1 (s), 20.8 (br). 31P{1H} NMR: ** 119.4 (br, 1/2 = 508 Hz).  51V NMR: ** -101.0 (s, 1/2 = 202 Hz).

**1.7. Synthesis of [Ar(R)N]3Nb[NP(Cl)(NHBut)] (4a)**

*Neat* Me3SiCl (1.9 mL, 15 mmol) cooled to –35 C was added via syringe to a solution of **3a** (0.826 g, 0.997 mmol) in benzene (8 mL) and the mixture was stirred for 2.5 h. The reaction solution was frozen and lypophilized to dryness and the residue was redissolved in benzene (4 mL), to which more *neat* Me3SiCl (1.7 mL, 13 mmol) was added. The mixture was stirred for 12 h and subsequently frozen and lypophilized to dryness. This procedure was repeated one more time and the residue was extracted with pentane (4 x 2 mL) and then dried *in vacuo* to yield **4a** (0.746 g, 0.942 mmol, 94%) as a yellow powder. Crystalline **4a** was obtained in 73% yield from pentane at –35 C. Anal. Calc. for C40ClD18H46N5NbP: C, 60.63; H, 8.14; N, 8.84. Found: C, 61.14; H, 8.10; N, 8.68%. 1H NMR: ** 6.70 (s, 3 H, *para*), 5.99 (br, 6 H, *ortho*), 3.47 (d, 1 H, N-H), 2.11 (s, 18 H, Me), 1.43 (s, 9 H, anilide But), 1.40 (d, 9 H, But, 4*J*P-H = 1.5 Hz).  13C{1H} NMR: ** 149.0 (s), 137.1 (s), 130.3 (s), 127.6 (s), 60.7 (s), 51.6 (d, 2*J*P-C = 9.9 Hz), 32.1 (s), 32.0 (d, 3*J*P-C = 10.7 Hz), 31.4 (hept, 1*J*D-C = 18.3 Hz), 21.5 (s). 31P{1H} NMR: ** 146.4 (br, 1/2 = 101 Hz).

**1.8. Synthesis of [Ar(But)N]3V[NP(Cl)(NHBut)] (4b)**

*Neat* Me3SiCl (20 mL) was added to a Schlenk flask charged with a stir bar and complex **3b** (0.400 g, 0.520 mmol) and the solution was stirred for 4 h at 23 C. All volatiles were removed *in vacuo* and fresh Me3SiCl (20 mL) was added, stirred for an additional 4 h, and pumped to dryness. This procedure was repeated one more time, at which point the 31P NMR spectra exhibited 85% conversion of **3b** to the desired product **4b**. The remaining dark orange residue was recrystallized from pentane (5 mL) at -35 C to yield orange microcrystalline **4b** (0.232 g, 0.317 mmol, 61%). Anal. Calc. for C40ClH64N5PV: C, 65.60; H, 8.81; N, 9.56. Found: C, 65.29; H, 9.02; N, 9.37%. 1H NMR: ** 6.69 (s, 3 H, *para*), 4.5-5 (br, 6 H, *ortho*), 3.65 (br, 1 H, N-H), 2.13 (s, 18 H, Me), 1.51 (s, 27 H, anilide But), 1.36 (d, 9 H, But, 4*J*P-H = 1.5 Hz).  13C{1H} NMR: ** 149.7 (s), 138.1 (s), 129.9 (s), 126.0 (s), 60.3 (s), 53.3 (br), 31.7 (s), 29.6 (br), 22.7 (s). 31P{1H} NMR: ** 151.0 (br, 1/2 = 662 Hz).  51V NMR: ** -38.1 (s, 1/2 = 240 Hz).

**1.9. Synthesis of [Ar(R)N]3Nb(NPNBut) (5a)**

A slurry of LiN(SiMe3)2 (0.122 g, 0.730 mmol) in pentane (4 mL) was added to a solution of **4a** (0.576 g, 0.727 mmol) in pentane (15 mL) and the resulting yellow mixture was stirred for 0.5 h and then filtered through Celite. All volatiles were removed *in vacuo* and the residue was extracted with benzene (10 mL) and subsequently frozen and lypophilized to dryness. Recrystallization from pentane at –35 C yielded bright yellow microcrystalline **5a** (0.362 g, 0.479 mmol, 66%). Anal. Calc. for C40D18H45N5NbP: C, 63.55; H, 8.40; N, 9.26. Found: C, 63.44; H, 8.22; N, 9.19%. 1H NMR: ** 6.69 (s, 3 H, *para*), 5.96 (br, 6 H, *ortho*), 2.09 (s, 18 H, Me), 1.65 (s, 9 H, But), 1.48 (s, 9 H, anilide But). 31P{1H} NMR: ** 318.1 (t, 1*J*14N-P = 61 Hz).

**1.10. Synthesis of [Ar(R)N]3V(NPNBut) (5b)**

A slurry of LiN(SiMe3)2 (0.093 g, 0.550 mmol) in pentane (10 mL) was added to a solution of **4b** (0.400 g, 0.546 mmol) in pentane (25 mL) and the resulting red mixture was stirred for 2 h and then filtered through Celite. All volatiles were removed *in vacuo* and the residue was recrystallized from diethyl ether at –35 C, yielding red microcrystalline **5b** (0.213 g, 0.306 mmol, 56%). Anal. Calc. for C40H63N5PV: C, 69.04; H, 9.13; N, 10.06. Found: C, 68.94; H, 9.55; N, 10.39%. 1H NMR: ** 6.69 (s, 3 H, *para*), 4-5 (br, 6 H, *ortho*), 2.14 (s, 18 H, Me), 1.58 (overlap, 36 H, But).  13C{1H} NMR: ** 151.1 (s), 140.6 (s), 131.2 (s), 125.5 (s), 59.8 (s), 51.7 (br), 33.3 (s), 27.4 (br), 20.9 (s). 31P{1H} NMR: ** 341.0 (br, 1/2 = 332 Hz).  51V NMR: ** -151.4 (s, 1/2 = 123 Hz).

**1.11. Synthesis of [Ar(R)N]3NbNP(-NBut)2PNNb[N(R)Ar]3 (6)**

Quantitative conversion of yellow **5a** to orange crystalline **6** was achieved by leaving a pentane solution of **5a** at 23 C for 12 h. 1H NMR: ** 6.76 (s, 6 H, *para*), 6.66 (s, 12 H, *ortho*), 2.30 (s, 36 H, Me), 1.68 (s, 18 H, But), 1.42 (s, 18 H, anilide But).  13C{1H} NMR: ** 150.1 (s), 136.7 (s), 130.2 (s), 126.9 (s), 60.2 (s), 52.1(s), 33.0 (s), 31.6 (s), 21.6 (s). 31P{1H} NMR: ** 240.4 (s, 1/2 = 72 Hz).

**2. Density Functional Theory Calculations**

The Amsterdam Density Functional package (version *ADF2000.02*) 3 was used to derive the 31P NMR chemical shift values 4 for complexes **2a**, **5a**, **6**, and **2b**-**5b**. For the purpose of minimizing the calculation time required for these calculations, the trisanilide moiety was simplified to an -NH2 group. The remaining parts of the molecules were left intact. Mirror symmetry, Cs, was imposed in the calculations for all molecules, with the exception of **4b** (C1) and **6** (Ci). Single-point calculations, preceding the NMR calculations, were run using the Zora(V) basis set for all atoms, as implemented in the ADF suite. Full electronic configuration was used for all atoms. Relativistic effects were included by virtue of the zero order regular approximation (ZORA).5 However, no spin-orbit coupling effects were taken into account in the derivation of the isotropic shielding for the phosphorus atoms. The local density approximation (LDA) by Vosko, Wilk and Nusair (VWN) 6 was used together with the exchange and correlation corrections published by Perdew and Wang in 1991 (PW91).7

The plot of the experimentally and theoretically determined values for the 31P NMR chemical shifts is shown in Figure A. The complex **2b** was set as a reference, *i.e.* the experimental and theoretical values were imposed to be coincidental. Table A shows the results of the theoretically calculated 31P NMR chemical shift values.

Figure A.


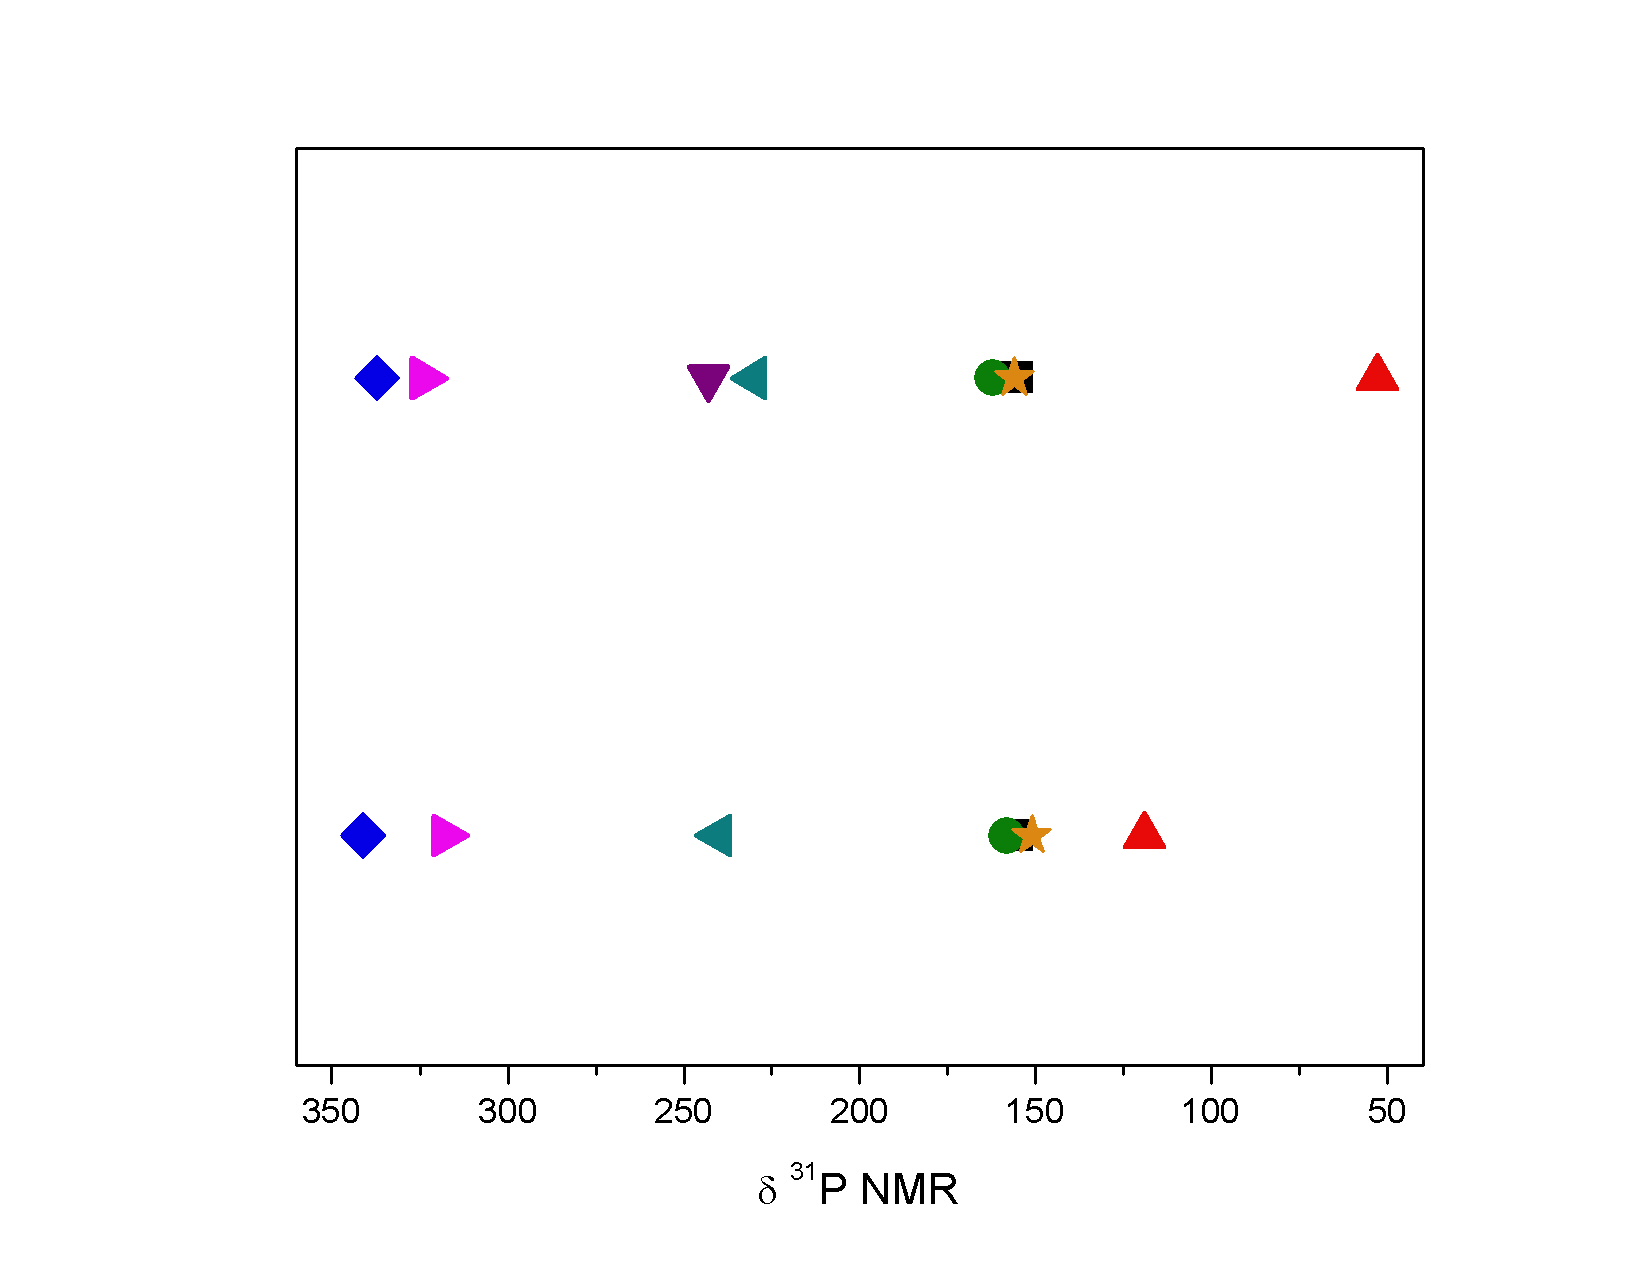


Theoretical and experimental 31P NMR chemical shift values are plotted at the top and bottom lines, respectively. [Ar(But)N]3V(NPCl2) ; [Ar(R)N]3Nb(NPCl2) ; [Ar(But)N]3V[NP(NHBut)2] ; [Ar(But)N]3V[NP(Cl)(NHBut)] ; [Ar(But)N]3V(NPNBut) ; [Ar(R)N]3Nb(NPNBut) ; {[Ar(But)N]3VNP(-NBut)}2 ;{[Ar(R)N]3NbNP(-NBut)}2 .

Table A.

|  | Shielding, theoretical | 31P NMR, experimental | 31P NMR,  theoretical |
| --- | --- | --- | --- |
| [Ar(But)N]3V(NPCl2) | 118 | 155 | 155 |
| [Ar(R)N]3Nb(NPCl2) | 111 | 158 | 162 |
| [Ar(But)N]3V[NP(NHBut)2] | 220 | 119 | 53 |
| [Ar(But)N]3V[NP(Cl)(NHBut)] | 117 | 151 | 156 |
| [Ar(But)N]3V(NPNBut) | -64 | 341 | 337 |
| [Ar(R)N]3Nb(NPNBut) | -51 | 318 | 324 |
| {[Ar(But)N]3VNP(-NBut)}2 | 30 | unknown | 243 |
| {[Ar(R)N]3NbNP(-NBut)}2 | 43 | 240 | 230 |

Sample Input File:

$ADFBIN/dirac < $ADFRESOURCES/Dirac/V

rm -f FILE* logfile

$ADFBIN/dirac < $ADFRESOURCES/Dirac/N

rm -f FILE* logfile

$ADFBIN/dirac < $ADFRESOURCES/Dirac/H

rm -f FILE* logfile

$ADFBIN/dirac < $ADFRESOURCES/Dirac/P

rm -f FILE* logfile

$ADFBIN/dirac < $ADFRESOURCES/Dirac/C

rm -f FILE* logfile

mv TAPE12 t12.rel

$ADFBIN/adf <<eor

Create V File=$ADFRESOURCES/ZORA/V/V

XC

GGA PW91

End

Relativistic Scalar ZORA

CorePotentials t12.rel &

V 1

End

End Input

eor

mv TAPE21 t21.V

$ADFBIN/adf <<eor

Create N File=$ADFRESOURCES/ZORA/V/N

XC

GGA PW91

End

Relativistic Scalar ZORA

CorePotentials t12.rel &

N 2

End

End Input

eor

mv TAPE21 t21.N

$ADFBIN/adf <<eor

Create H File=$ADFRESOURCES/ZORA/V/H

XC

GGA PW91

End

Relativistic Scalar ZORA

CorePotentials t12.rel &

H 3

End

End Input

eor

mv TAPE21 t21.H

$ADFBIN/adf <<eor

Create P File=$ADFRESOURCES/ZORA/V/P

XC

GGA PW91

End

Relativistic Scalar ZORA

CorePotentials t12.rel &

P 4

End

End Input

eor

mv TAPE21 t21.P

$ADFBIN/adf <<eor

Create C File=$ADFRESOURCES/ZORA/V/C

XC

GGA PW91

End

Relativistic Scalar ZORA

CorePotentials t12.rel &

C 5

End

End Input

eor

mv TAPE21 t21.C

$ADFBIN/adf << eor > geometry.out

Title (H2N)3V(NPNBut)

atoms Z-matrix

V 0 0 0 0.000000 0.000000 0.000000

N 1 0 0 1.71 0.000000 0.000000

P 2 1 0 1.636 171.284210 0.000000

N 3 2 1 1.57 105 0.000000

N 1 2 3 1.87 110.125565 180.000000

N 1 2 3 1.87 107.048317 58.407711

N 1 2 3 1.87 107.048317 -58.407711

H 5 1 2 1.022574 120.811775 -69.309830

H 5 1 2 1.022574 120.811775 69.309830

H 6 1 2 1.022214 122.257500 85.468742

H 6 1 2 1.022229 121.274773 -58.408302

H 7 1 2 1.022214 122.257500 -85.468742

H 7 1 2 1.022229 121.274773 58.408302

C 4 3 2 1.470000 120 180.000000

C 14 4 3 1.540000 109.471000 180.000000

C 14 4 3 1.540000 109.471000 300.000000

C 14 4 3 1.540000 109.471000 60.000000

H 15 14 17 1.089000 109.471000 120.000000

H 15 14 17 1.089000 109.471000 240.000000

H 15 14 17 1.089000 109.471000 0.000000

H 17 14 16 1.089000 109.471000 180.000000

H 17 14 16 1.089000 109.471000 300.000000

H 17 14 16 1.089000 109.471000 60.000000

H 16 14 15 1.089000 109.471000 180.000000

H 16 14 15 1.089000 109.471000 300.000000

H 16 14 15 1.089000 109.471000 60.000000

end

Symmetry=C(s)

XC

GGA PW91

End

Fragments

V t21.V

N t21.N

H t21.H

C t21.C

P t21.P

End

Relativistic ZORA

CorePotentials t12.rel &

V 1

N 2

H 3

P 4

C 5

End

End Input

eor

rm -f t12.rel t21*

mv TAPE21 t21.nmr

mv logfile logfile_d

mv t21.nmr TAPE21

$ADFBIN/nmr << eor > NMR.out

NMR

U1K BEST

NUC 7

END

eor

**3. References**

1. M. G. Fickes, A. L. Odom and C. C. Cummins, *Chem. Commun.*, 1997, 1993.
2. M. G. Fickes, Ph.D. Thesis, Massachusetts Institute of Technology, MA, 1998.
3. E. J. Baerends, D. E. Ellis and P. Ros, *Chem. Phys.*, 1973, **2**, 41; L. Versluis and T. Ziegler, *J. Chem. Phys.*, 1988, **322**, 88; G. te Velde and E. J. Baerends, *J. Comput. Phys.*, 1992, **99**, 84; C. Fonseca Guerra, J. G. Snijders, G. te Velde and E. J. Baerends, *Theor. Chem. Acc.*, 1998, **99**, 391.
4. G. Schreckenbach and T. Ziegler, *J. Phys. Chem.*, 1995, **99**, 606; G. Schreckenbach and T. Ziegler, *Int. J. Quantum Chem.*, 1996, **60**, 753; G. Schreckenbach and T. Ziegler, *Int. J. Quantum Chem.*, 1997, **61**, 899; S. K. Wolff and T. Ziegler, *J. Chem. Phys.*, 1998, **109**, 895; S. K. Wolff, T. Ziegler, E. van Lenthe and E. J. Baerends, *J. Chem. Phys.*, 1999, **110**, 7689; T. M. Gilbert and T. Ziegler, *J. Phys. Chem. A*, 1999, **103**, 7535.
5. J. G. Snijders, E. J. Baerends and P. Ros, *Mol. Phys.*, 1979, **38**, 1909; T. Ziegler, V. Tschinke, E. J. Baerends, J. G. Snijders and W. Ravenek, *J. Phys. Chem.*, 1989, **93**, 3050; E. van Lenthe, E. J. Baerends and J. G. Snijders, *J. Chem. Phys.*, 1993, **99**, 4597.
6. S. H. Vosko, L. Wilk and M. Nusair, *Can. J. Phys.*, 1980, **58**, 1200.
7. J. P. Perdew, J. A. Chevary, S. H. Vosko, K. A. Jackson, M. R. Pederson, D. J. Singh and C. Fiolhais, *Phys. Rev. B*, 1992, **46**, 6671.
